# Supplementary material for: Predicting and clustering plant CLE genes with a new method developed specifically for short amino acid sequences
Source: PubMed Central journal article supplement (PMC7552357; doi:10.1186/s12864-020-07114-8), 2020-10-12
Supplement: 12864_2020_7114_MOESM3_ESM.pdf [file 12864_2020_7114_MOESM3_ESM.pdf]

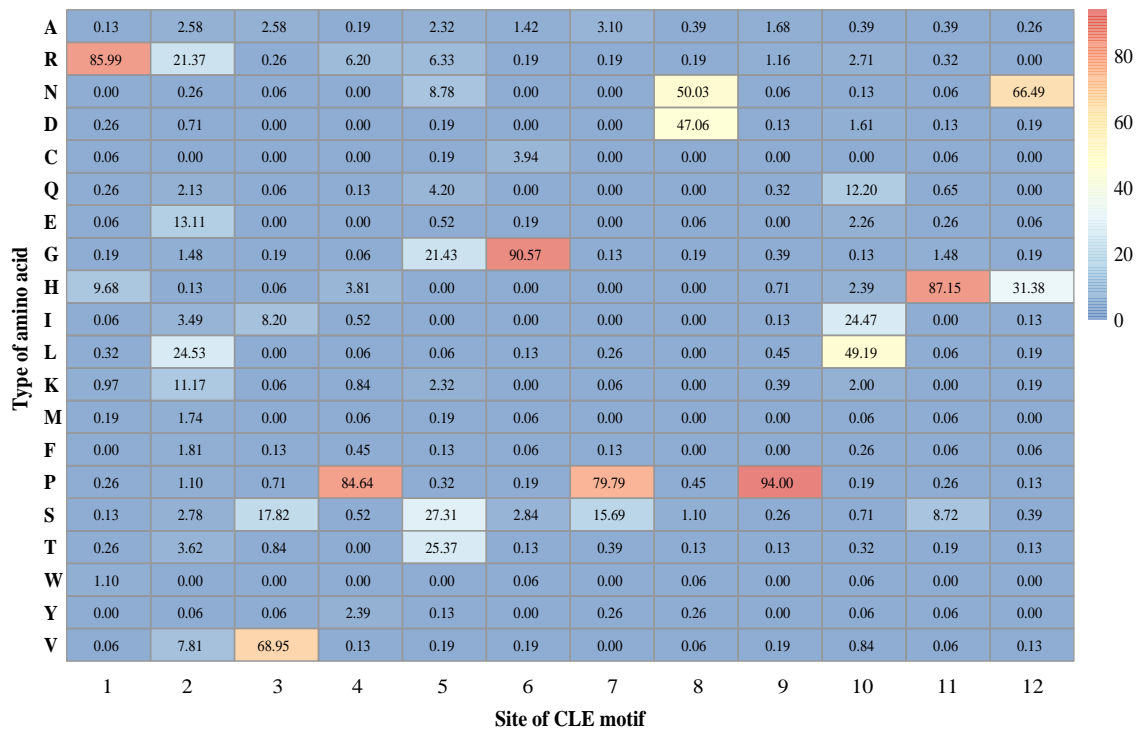

**Figure S3 Amino acid usage frequency of CLE motifs**

Amino acid one letter codes were listed on the left. Each number in the grid represents the frequency of a certain amino acid at the corresponding site.
