# Supplementary material for: Predicting and clustering plant CLE genes with a new method developed specifically for short amino acid sequences
Source: PubMed Central journal article supplement (PMC7552357; doi:10.1186/s12864-020-07114-8), 2020-10-12
Supplement: 12864_2020_7114_MOESM5_ESM.pdf [file 12864_2020_7114_MOESM5_ESM.pdf]

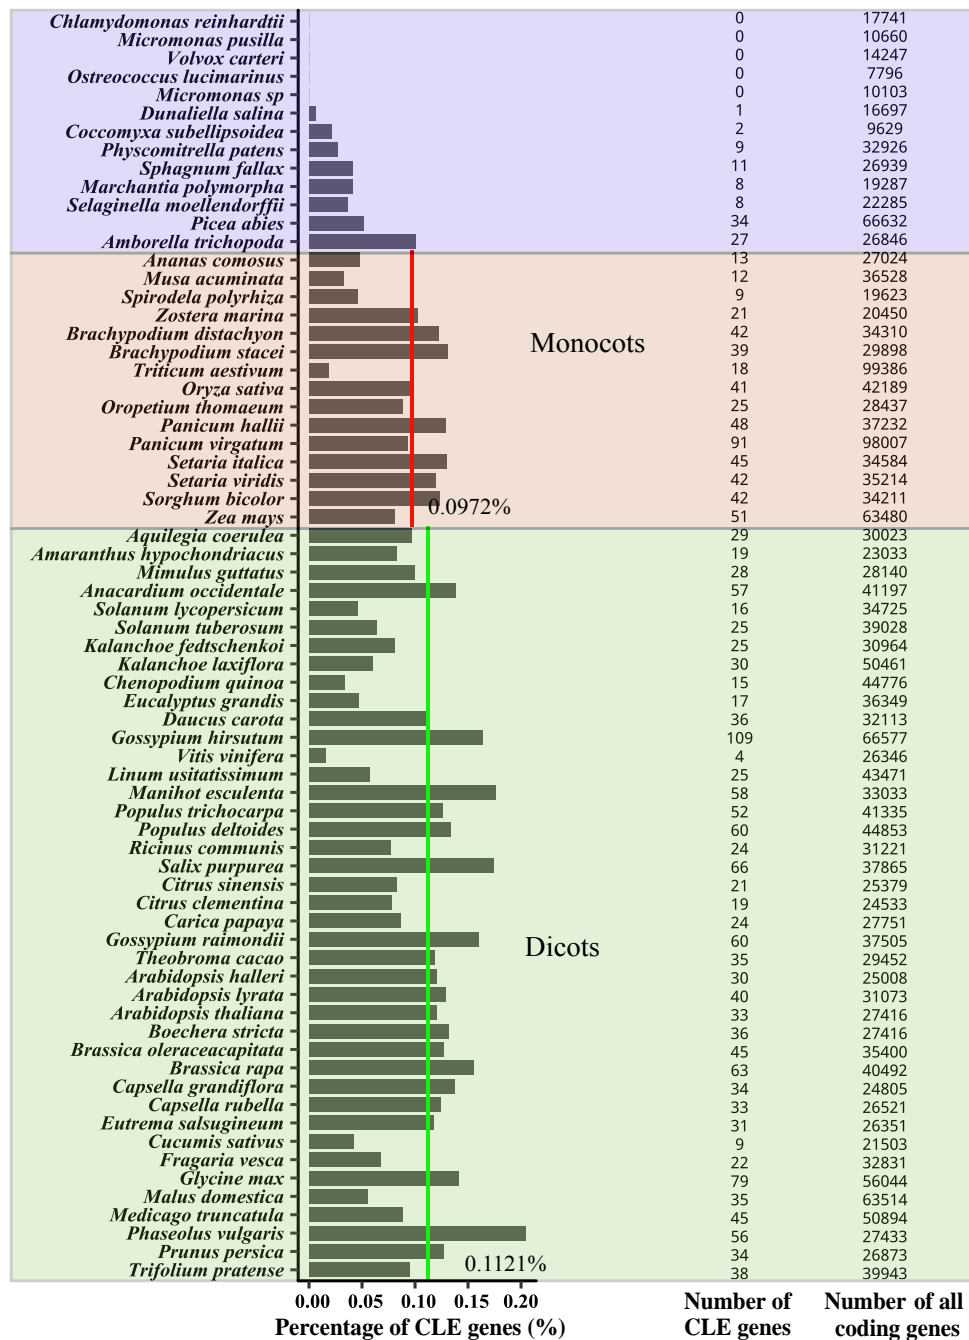

**Figure S5 The number and the proportion of *CLE* genes in the genomes of 69 plant species**  
 From the left to the right: Latin names of plant species, the percentage of *CLE* genes in the genome of each species, the total number of *CLE* genes in the genome of each species, and the total number of genes in the genome of each species. The background colors represent the taxonomy of species: light green, dicots; sand color, monocots; purple, other species. The two vertical lines in the histogram represent the median value of the percentage of *CLE* genes in the genome, red for the monocots and green for the dicots.
