# Supplementary material for: Predicting and clustering plant CLE genes with a new method developed specifically for short amino acid sequences
Source: PubMed Central journal article supplement (PMC7552357; doi:10.1186/s12864-020-07114-8), 2020-10-12
Supplement: 12864_2020_7114_MOESM6_ESM.pdf [file 12864_2020_7114_MOESM6_ESM.pdf]

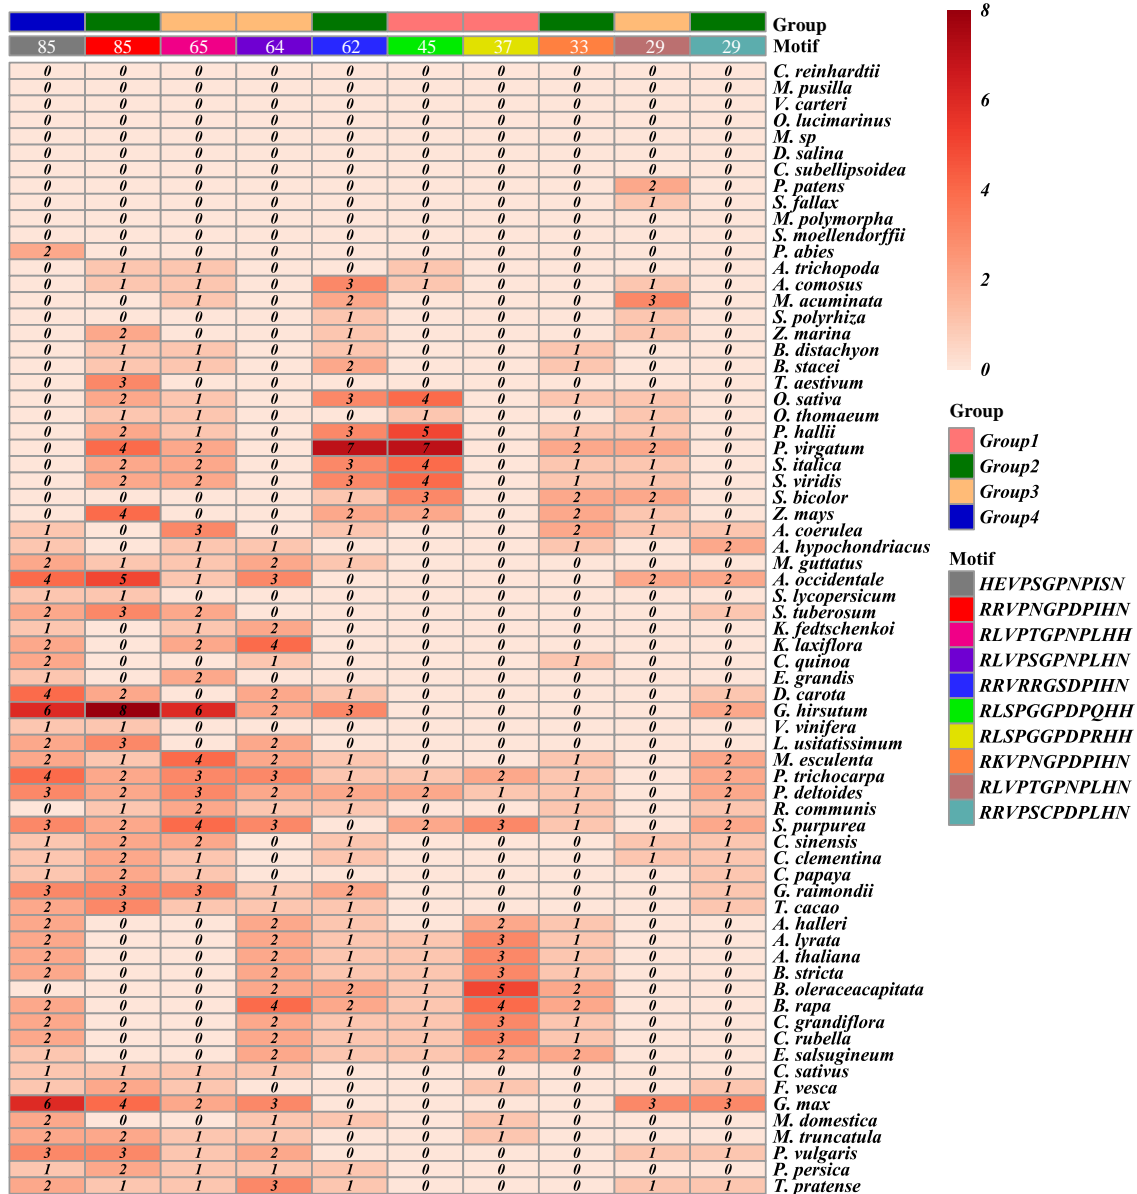

**Figure S6 The top ten most frequently used CLE motifs in 69 species**

Ten most frequently used CLE motifs were selected based on their total counts in the genomes of 69 plant species. A heatmap in 10 x 69 grids was created to display the counts of each motif in each species. The counts of CLE candidates were indicated by using the gradient in red: dark red means more and light red means less. The Latin name of each species and the motif sequences were listed on the left; the total counts of each CLE motif were shown on the top.
