# Supplementary material for: Predicting and clustering plant CLE genes with a new method developed specifically for short amino acid sequences
Source: PubMed Central journal article supplement (PMC7552357; doi:10.1186/s12864-020-07114-8), 2020-10-12
Supplement: 12864_2020_7114_MOESM7_ESM.pdf [file 12864_2020_7114_MOESM7_ESM.pdf]

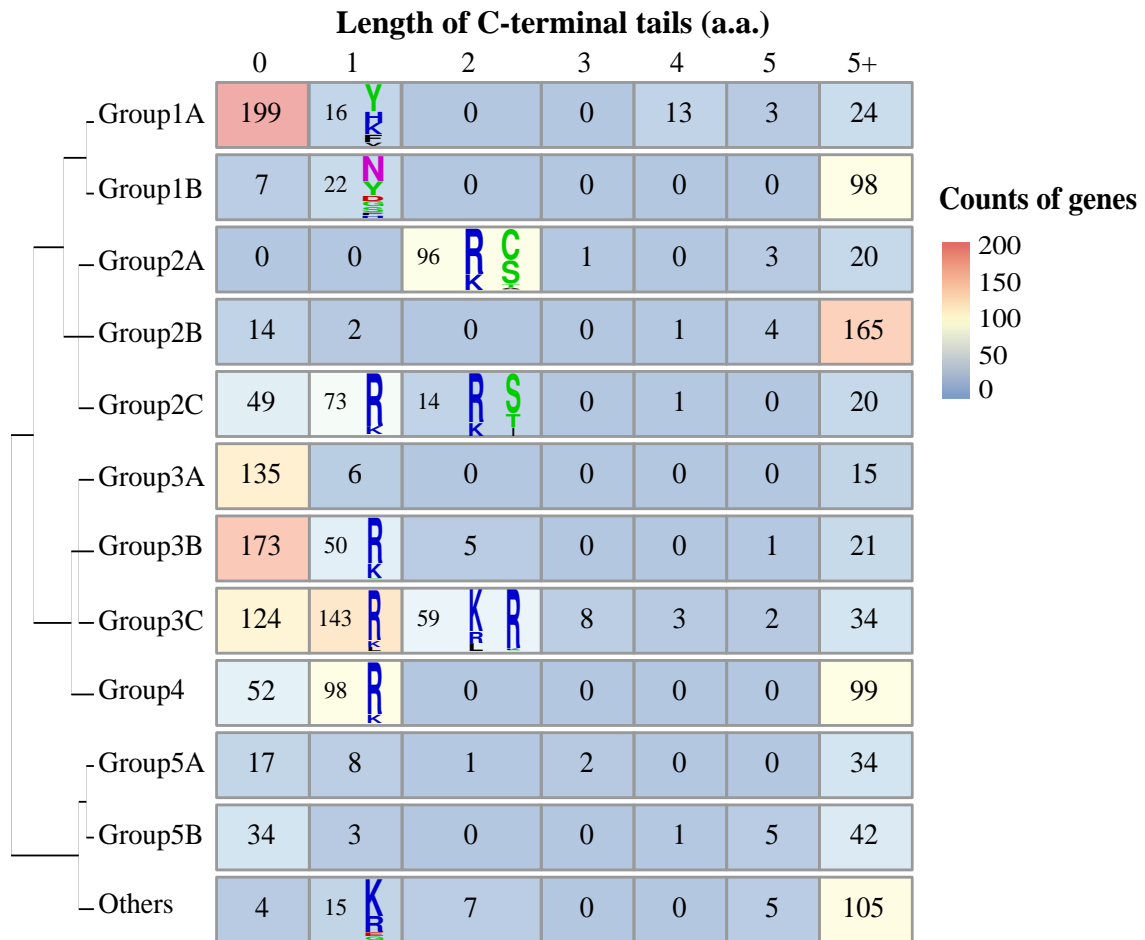

**Figure S7 Statistical analysis of the lengths of the C-terminal tails of CLE candidates**

A heatmap in 7 x 12 grids was created to display the number of CLE candidates in different lengths of the C-terminal tails (abscissa) and in different subgroups of CLE family (ordinate). Length of the C-terminal tails = 0 a.a. means no C-terminal tail after the CLE motif. Under the circumstance of tail = 1 or 2 a.a., Weblogo representation of the tails were created to show the corresponding amino acid composition if the number of CLE candidates was more than 10.
