# Supplementary material for: Predicting and clustering plant CLE genes with a new method developed specifically for short amino acid sequences
Source: PubMed Central journal article supplement (PMC7552357; doi:10.1186/s12864-020-07114-8), 2020-10-12
Supplement: 12864_2020_7114_MOESM9_ESM.pdf [file 12864_2020_7114_MOESM9_ESM.pdf]

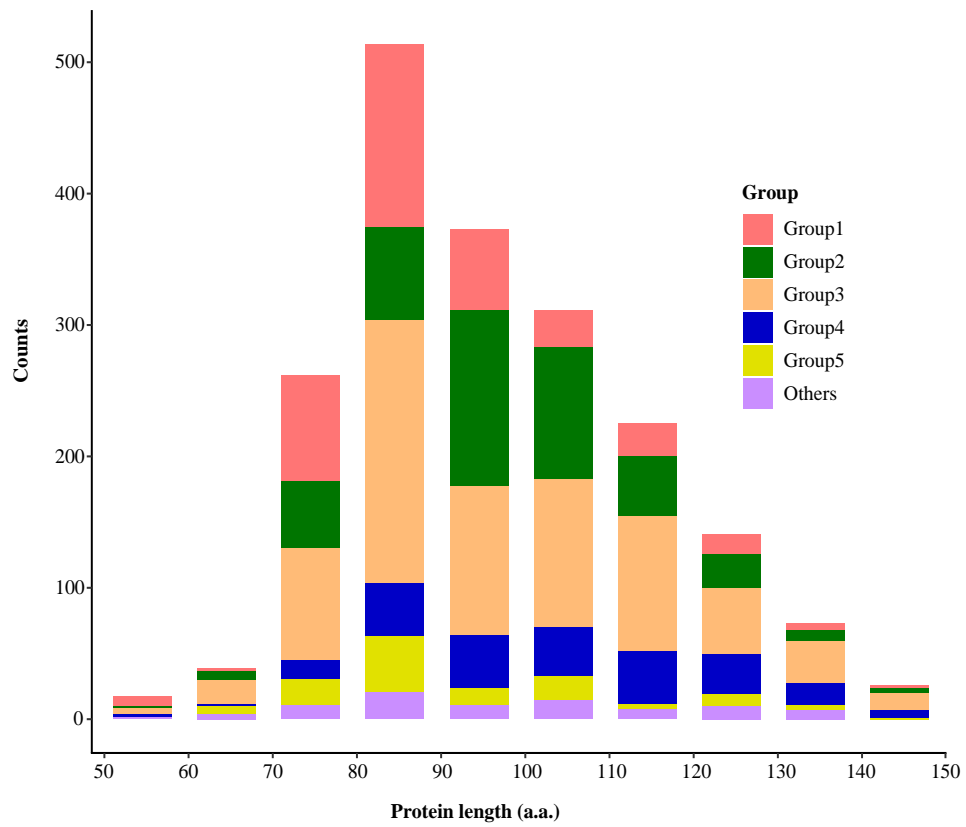

**Figure S9** Distribution of protein lengths of CLE precursors in the range of 50-150 a.a
