# Supplementary material for: Predicting and clustering plant CLE genes with a new method developed specifically for short amino acid sequences
Source: PubMed Central journal article supplement (PMC7552357; doi:10.1186/s12864-020-07114-8), 2020-10-12
Supplement: 12864_2020_7114_MOESM10_ESM.pdf [file 12864_2020_7114_MOESM10_ESM.pdf]

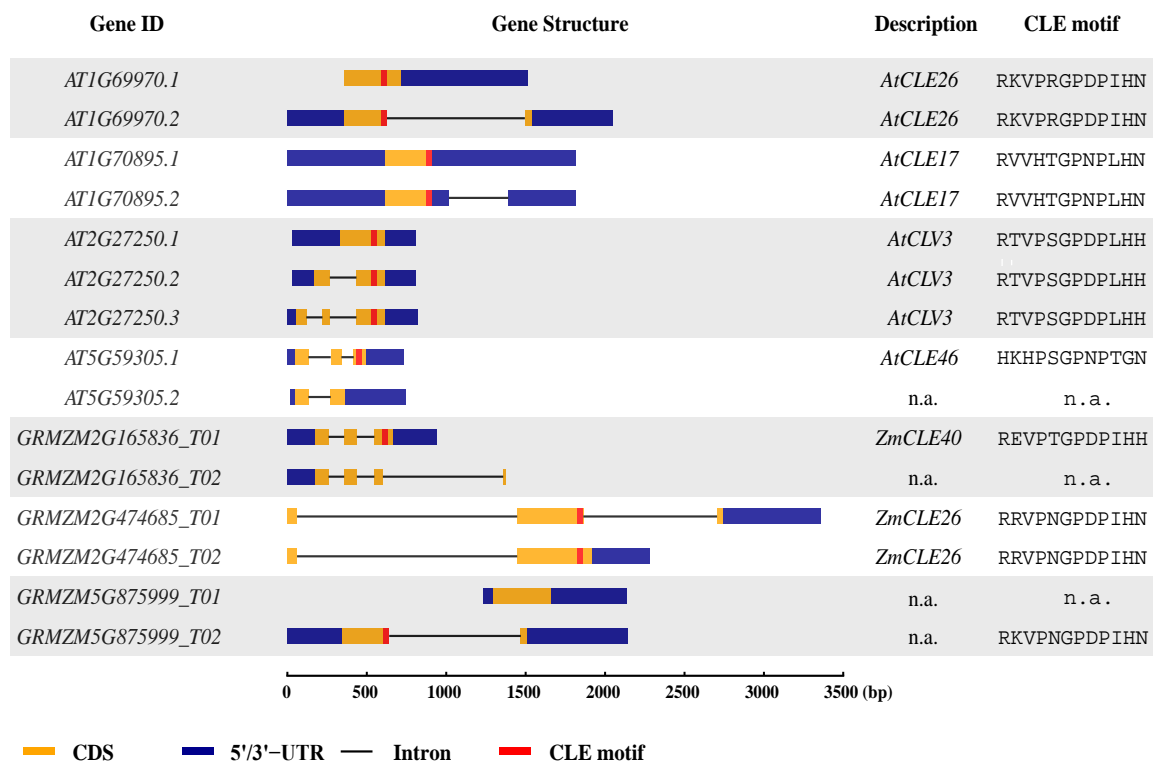

**Figure S10 Gene structure of *CLE* candidates containing alternative splicing in *A. thaliana* and *Z. may***  
 From the left to the right: gene ID, gene structure, gene description and motif sequences of *CLE* candidates. containing alternative splicing in *A. thaliana* and *Z. may*. Gene structure was depicted using ggplot2-3.2.0. Orange box, CDS; navy blue box, UTR; red box, *CLE* motif; black line, intron; n.a., information not available.
