# Supplementary material for: Predicting and clustering plant CLE genes with a new method developed specifically for short amino acid sequences
Source: PubMed Central journal article supplement (PMC7552357; doi:10.1186/s12864-020-07114-8), 2020-10-12
Supplement: 12864_2020_7114_MOESM11_ESM.pdf [file 12864_2020_7114_MOESM11_ESM.pdf]

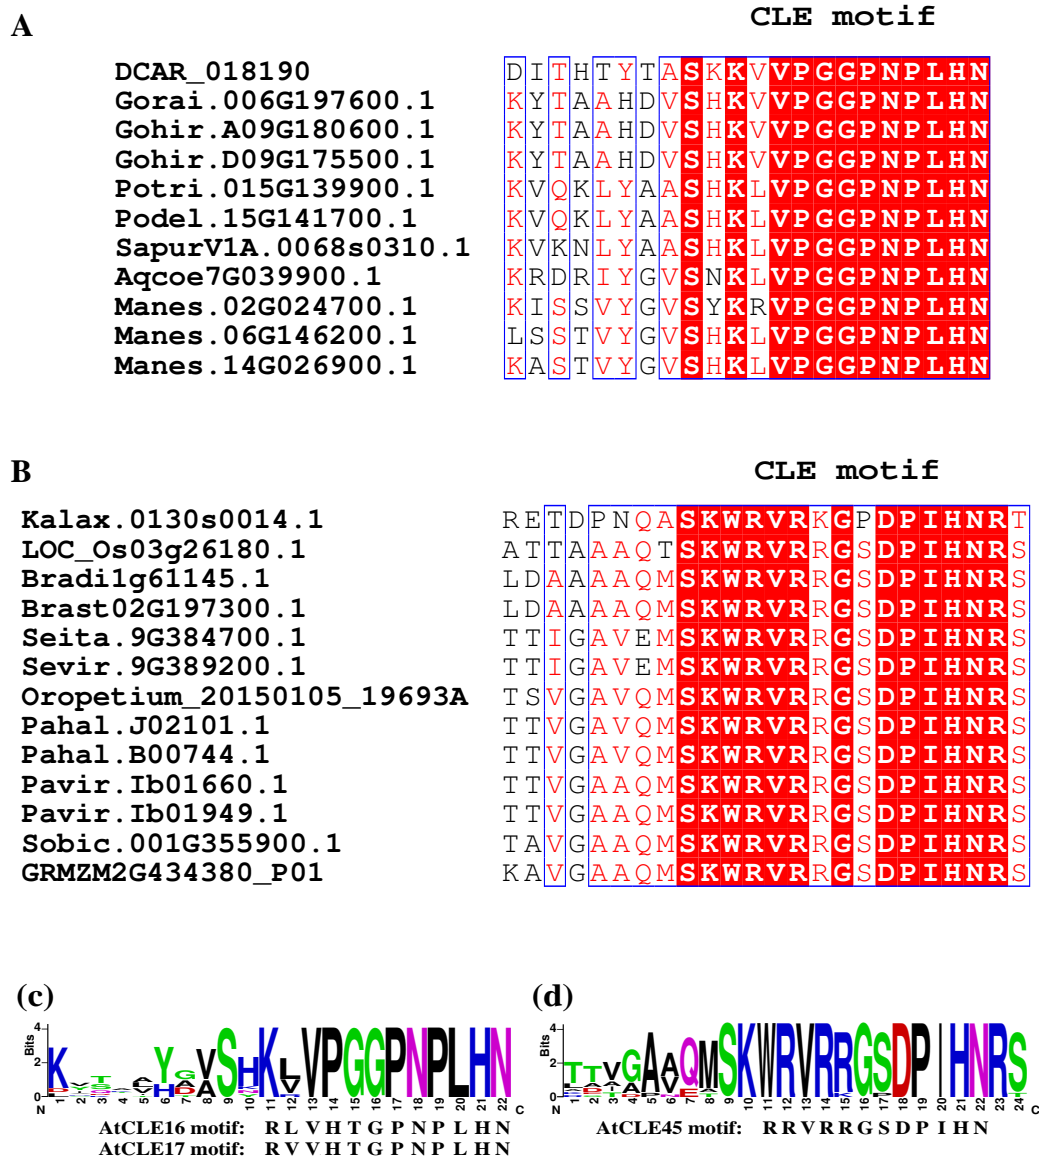

**Figure S11 K-type and W-type CLE candidates in plants**

(A, B) Alignment of K-type and W-type CLE candidates, respectively. CLE motifs were indicated by blue lines. (C, D) Weblogo representation of K-type and W-type CLE candidates, respectively. The CLE motifs of the closest *AtCLE* genes were shown below the Weblogos.
